# Supplementary material
Source: publisher site journal article supplement (https://www.spandidos-publications.com/4089/downloadSupplementary)

Figure S1. (A) Correlation between serum albumin level and TIL density. (B) Association between peripheral blood lymphocyte count and TIL density. TIL, tumor-infiltrating lymphocyte.

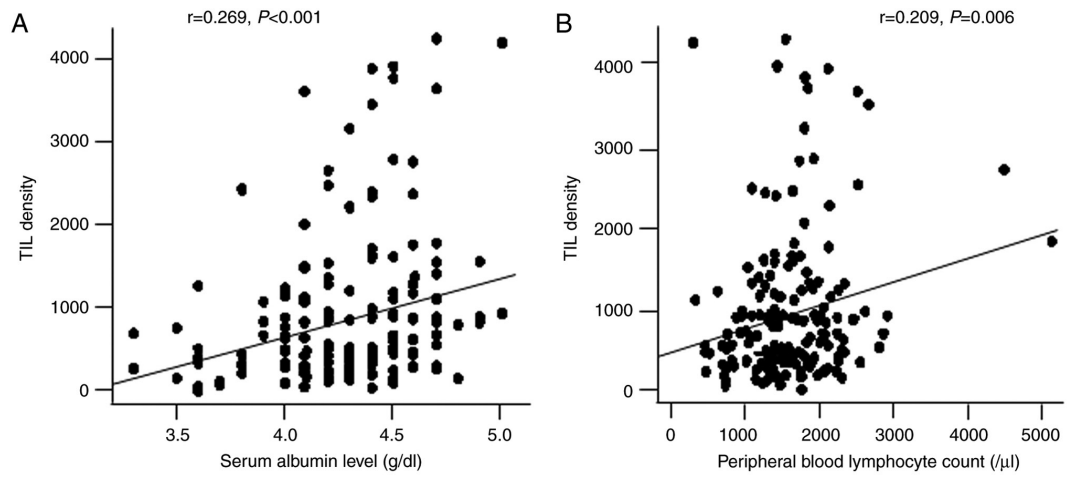

Supplement: Supplementary file 1 [file downloadSupplementary]
